# Supplementary material
Source: PubMed Central journal article supplement (PMC4474603)
Supplement: NIHMS699775-supplement-Supplementary_files.pdf [file NIHMS699775-supplement-Supplementary_files.pdf]

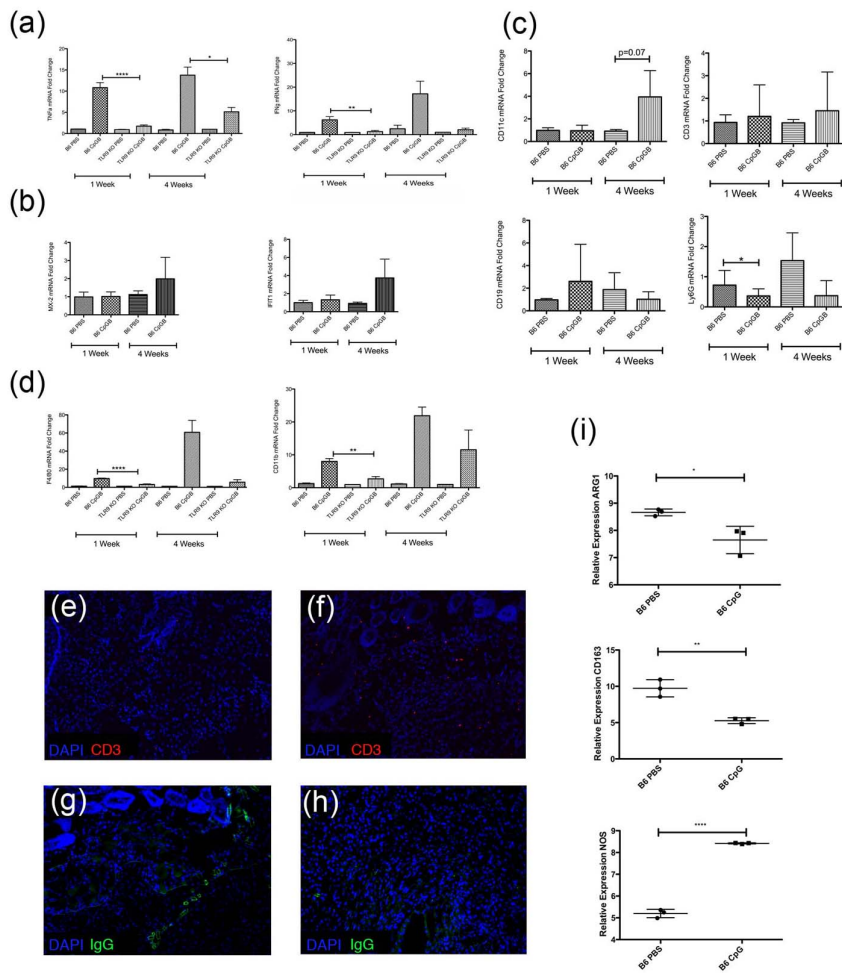

S. Figure 1: TLR9-dependent TNF $\alpha$  and IFN $\gamma$  induction, no type I interferon response to CpGB DNA treatment, and specific recruitment of macrophages to CpGB DNA treated skin. (A) IFN $\gamma$  and TNF $\alpha$  gene expression analysis, comparing wildtype (B6) and TLR9-deficient (TLR9 KO) mice. (B) Gene expression analysis for type I interferon-inducible genes: MX-2 and IFIT1. (C) Gene expression analysis for markers of dendritic cells (CD11c), B cells (CD19), T cells (CD3) and neutrophils (Ly6G). (D) Gene expression analysis for macrophage markers, F4/80 and CD11b. (A, D) B6 PBS 1 week: n=4; B6 CpGB 1 week: n=5; TLR9 KO PBS 1 week: n=3; TLR9 KO CpGB 1 week: n=5; B6 PBS 4 week: n=3; B6 CpGB 4 week: n=5; TLR9 KO PBS 4 week: n=1; TLR9 KO CpGB 4 week: n=2. (B, C) PBS 1 week: n=8; CpGB 1 week: n=11; PBS 4 week: n=3; CpGB 4 week: n=5. Gene expression is normalized to GAPDH and compared to the respective PBS treated mouse. \* p<0.05; \*\* p<0.01; \*\*\* p<0.001; \*\*\*\* p<0.0001. (E, F) CD3-PE staining; (G, H) Alexa Fluor 488-conjugated IgG2b isotype control; (E, G) 1 week PBS-treated B6 skin; (F, H) 1 week CpGB DNA-treated B6 skin. All skin counterstained with DAPI nuclear staining. All images taken at 10X magnification. (I) Nanostring gene expression analysis for macrophage markers ARG1, CD163, and NOS at 1 week in B6 mice; PBS n=3, CpG n=3. \* p<0.05; \*\* p<0.01; \*\*\* p<0.001; \*\*\*\* p<0.0001.

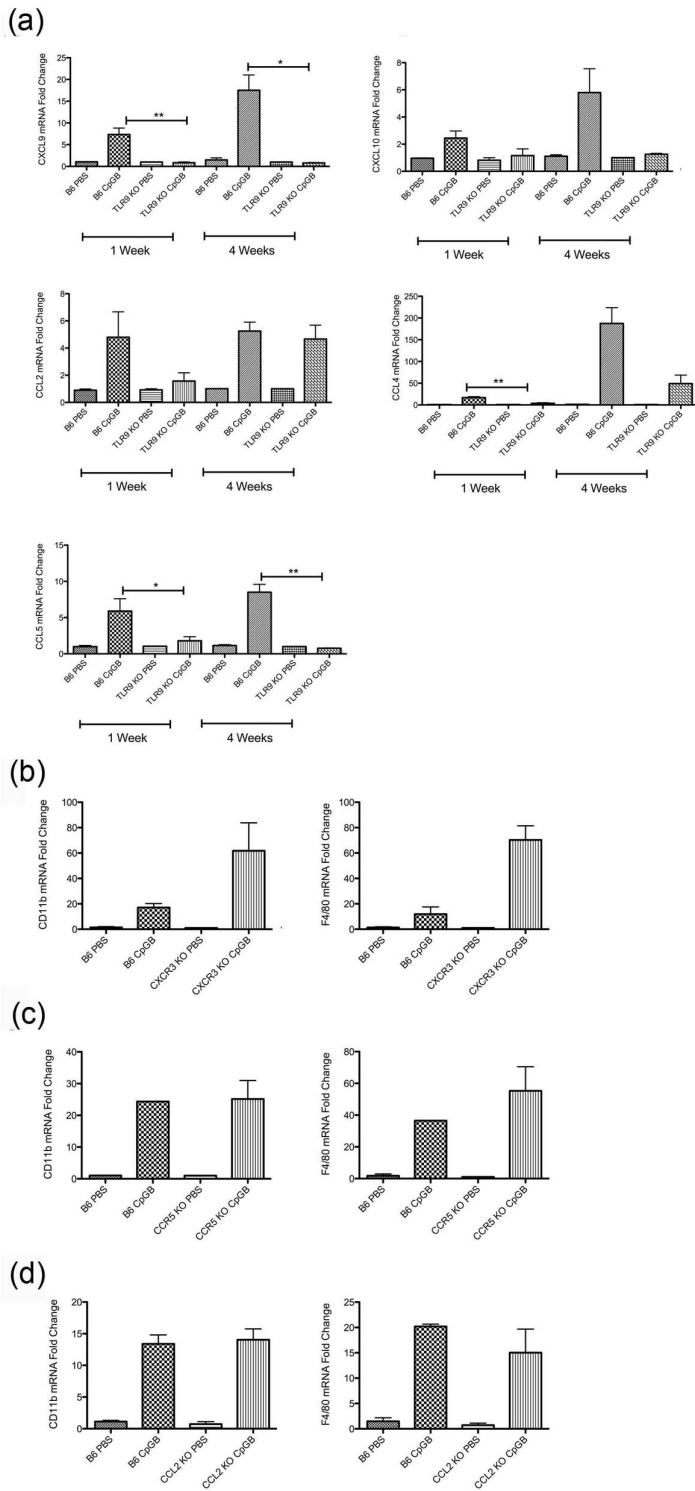

S. Figure 2: Chemokine expression after CpGB DNA treatment is TLR9-dependent, and cell recruitment is not dependent on CXCR3, CCR5, or CCL2 signaling. (A) Gene expression analysis for chemokines, CXCL2, CCL2, CCL4, CCL5, CXCL9, and CXCL10, comparing wildtype (B6) and TLR9-deficient (TLR9 KO) mice. B6 PBS 1 week: n=4; B6 CpGB 1 week: n=5; TLR9 KO PBS 1 week: n=3; TLR9 KO CpGB 1 week: n=5; B6 PBS 4 week: n=3; B6 CpGB 4 week: n=5; TLR9 KO PBS 4 week: n=1; TLR9 KO CpGB 4 week: n=2. (B-D) Gene expression analysis for macrophage markers, F4/80 and CD11b, comparing 1 week PBS and CpGB DNA treated wildtype (B6) mice to (B) CXCR3-deficient (CXCR3 KO) mice, (C) CCR5-deficient (CCR5 KO) mice, and (D) CCL2-deficient (CCL2 KO) mice. (B) B6 PBS: n=2; B6 CpGB: n=3; CXCR3 KO PBS: n=1; CXCR3 KO CpGB: n=3 (C) B6 PBS: n=2; B6 CpGB: n=1; CCR5 KO PBS: n=1; CCR5 KO CpGB: n=3 (D) B6 PBS: n=2; B6 CpGB: n=3; CCL2 KO PBS: n=2; CCL2 KO CpGB: n=2. Gene expression is normalized to GAPDH and compared to the respective PBS treated mouse. \*  $p < 0.05$ ; \*\*  $p < 0.01$ .

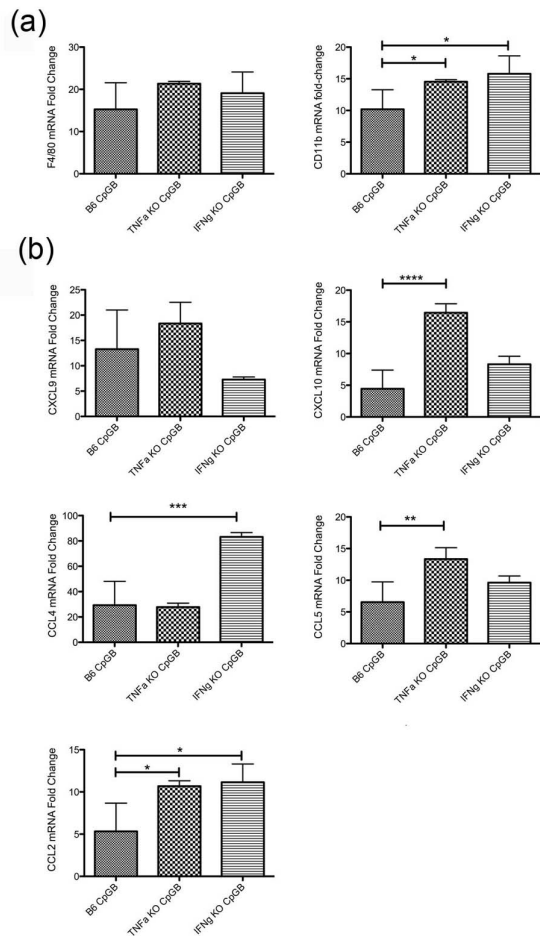

S. Figure 3: CpGB DNA-induced chemokine expression and cell recruitment are not dependent on IFN $\gamma$  or TNF $\alpha$  signaling.

(A) CD11b and F4/80 gene expression comparisons between wildtype (B6), TNF $\alpha$ -deficient, and IFN $\gamma$ -deficient mice after treatment with CpGB DNA for 1 week. (B) Gene expression comparisons of chemokines: CXCL9, CXCL10, CCL2, CCL4, and CCL5, between wildtype (B6), TNF $\alpha$ -deficient, and IFN $\gamma$ -deficient mice after treatment with CpGB DNA for 1 week. For B6 CpGB DNA-treated mice, n=11 and for all IFN $\gamma$  and TNF $\alpha$ -deficient CpGB DNA-treated mice, n=3. Data collected from 2 experiments. Gene expression is normalized GAPDH and compared to the respective PBS-treated mouse. \* p<0.05; \*\* p<0.01; \*\*\* p<0.001, \*\*\*\*p<0.0001

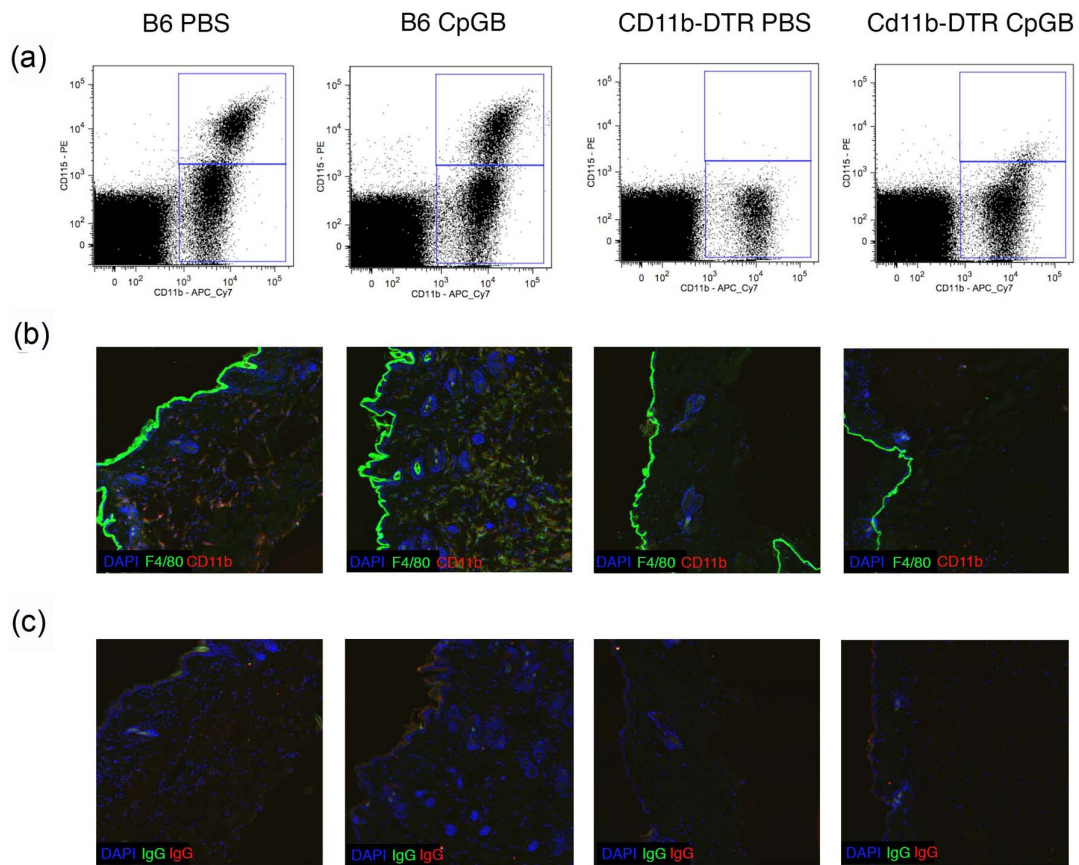

S. Figure 4: Initial CpGB DNA-induced skin inflammation is not dependent on granulocytes.  
 (A) Ly6G, CD11c, CD11b, TLR9, CCR1, and CCL3 gene expression comparisons from skin of wildtype (B6) mice 6 hours following after subcutaneous injection with CpGB n=3 and PBS n=3. Gene expression is normalized GAPDH and compared to the respective PBS-treated mouse. \* p<0.05; \*\* p<0.01; \*\*\* p<0.001, \*\*\*\*p<0.0001 (B) Immunofluorescence staining for CD11b and Ly6G in B6 skin 6 hours following subcutaneous injection with PBS. (B) Immunofluorescence staining for CD11b and Ly6G in B6 skin 6 hours following subcutaneous injection with CpG.

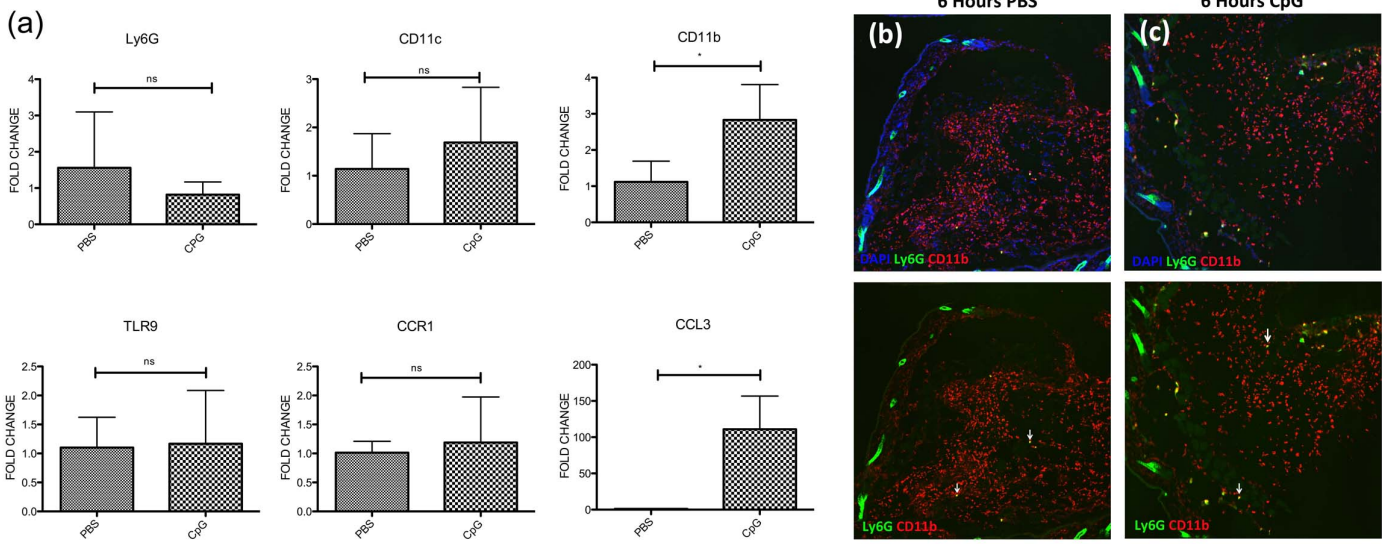

S. Figure 5: CD11b depletion by diphtheria toxin inducible mouse model.

(A) Flow cytometry analysis of PBMCs in B6 and CD11b-DTR mice after DT i.p. injection and 2 days of treatment with PBS or CpGB DNA, using CD11b-APC\_Cy7, CD115-PE, Ly6C-Pacific Blue, and AmCyan Live/Dead cell staining. Data is gated on all live single cells. Data shown is a representative image. (B-C) Immunofluorescence from skin of B6 and CD11b-DTR mice after DT i.p. injection and 2 days of treatment with PBS or CpGB DNA. All sections are counterstained with DAPI. All images are taken at 20X magnification. (B) Colocalization staining of F4/80-Alexa Fluor 488 and CD11b-PE (C) Isotype Controls: IgG2b-Alexa Fluor 488 and IgG2b-PE.

| Gene Name                                           | Abbreviation | mRNA Fold Change | Standard Deviation |
|-----------------------------------------------------|--------------|------------------|--------------------|
| Angiotensin II receptor-like 1                      | Agtr1        | 0.40             | 0.49               |
| Brain-derived neurotrophic factor                   | Bdnf         | 0.59             | 0.20               |
| Burkitt lymphoma receptor 1                         | Blr1         | 1.00             | 0.15               |
| Bone morphogenetic protein 10                       | BMP10        | 0.73             | 0.29               |
| Bone morphogenetic protein 15                       | BMP15        | 0.43             | 0.24               |
| Bone morphogenetic protein 6                        | BMP6         | 0.51             | 0.31               |
| Chemokine binding protein 2                         | Ccbp2        | 0.54             | 0.32               |
| Chemokine (C-C motif) ligand 1                      | CCL1         | 0.58             | 0.13               |
| Chemokine (C-C motif) ligand 11                     | CCL11        | 0.35             | 0.38               |
| Chemokine (C-C motif) ligand 12                     | CCL12        | 1.02             | 0.72               |
| Chemokine (C-C motif) ligand 17                     | CCL17        | 0.43             | 0.14               |
| Chemokine (C-C motif) ligand 19                     | CCL19        | 0.77             | 0.13               |
| Chemokine (C-C motif) ligand 2                      | CCL2         | 3.41             | 3.13               |
| Chemokine (C-C motif) ligand 20                     | CCL20        | 0.68             | 0.11               |
| Chemokine (C-C motif) ligand 4                      | CCL4         | 19.54            | 7.78               |
| Chemokine (C-C motif) ligand 5                      | CCL5         | 7.21             | 6.31               |
| Chemokine (C-C motif) ligand 6                      | CCL6         | 0.19             | 0.14               |
| Chemokine (C-C motif) ligand 7                      | CCL7         | 3.09             | 2.16               |
| Chemokine (C-C motif) ligand 8                      | CCL8         | 0.08             | 0.06               |
| Chemokine (C-C motif) ligand 9                      | CCL9         | 0.60             | 0.22               |
| Chemokine (C-C motif) receptor 1                    | CCR1         | 0.41             | 0.45               |
| Chemokine (C-C motif) receptor 10                   | CCR10        | 0.51             | 0.19               |
| Chemokine (C-C motif) receptor 1-like 1             | CCR1L1       | 0.91             | 0.22               |
| Chemokine (C-C motif) receptor 2                    | CCR2         | 0.40             | 0.44               |
| Chemokine (C-C motif) receptor 3                    | CCR3         | 1.21             | 1.22               |
| Chemokine (C-C motif) receptor 4                    | CCR4         | 0.54             | 0.22               |
| Chemokine (C-C motif) receptor 5                    | CCR5         | 2.16             | 1.73               |
| Chemokine (C-C motif) receptor 6                    | CCR6         | 0.85             | 0.15               |
| Chemokine (C-C motif) receptor 7                    | CCR7         | 1.32             | 1.30               |
| Chemokine (C-C motif) receptor 8                    | CCR8         | 0.59             | 0.16               |
| Chemokine (C-C motif) receptor 9                    | CCR9         | 0.95             | 0.72               |
| Chemokine (C-C motif) receptor-like 1               | CCRL1        | 0.50             | 0.20               |
| Chemokine (C-C motif) receptor-like 2               | CCRL2        | 1.64             | 0.35               |
| Chemokine-like receptor 1                           | Cmklr1       | 0.41             | 0.35               |
| CKLF-like MARVEL transmembrane domain containing 2a | Cmtm2a       | 0.55             | 0.32               |
| CKLF-like MARVEL transmembrane domain containing 3  | Cmtm3        | 1.14             | 0.42               |
| CKLF-like MARVEL transmembrane domain containing 4  | Cmtm4        | 0.68             | 0.30               |
| CKLF-like MARVEL transmembrane domain containing 5  | Cmtm5        | 0.60             | 0.11               |

Table 1: Chemokine array for CpGB DNA-treated skin.

All 84-gene expression analysis of chemokine and chemokine receptors on the RT2 Profiler™ PCR Array: Mouse Chemokines & Receptors (SA Biosciences). Data is given as an average mRNA fold change in comparison to PBS-treated mice in addition to standard deviation. n=4.
